# Supplementary material
Source: ML conference proceedings conference paper supplement (https://proceedings.mlr.press/v139/wang21j.html)
Supplement: Supplementary file [file wang21j-supp.pdf]

# Supplementary Material: Global Convergence of Policy Gradient for Linear-Quadratic Mean-Field Control/Game in Continuous Time

Weichen Wang <sup>\*</sup>, Jiequn Han <sup>†</sup>, Zhuoran Yang <sup>‡</sup> and Zhaoran Wang <sup>§</sup>

## Abstract

The supplemental material contains supporting proofs for the main document.

## A Proofs for Section 2

**Lemma A.1.** (Solution of continuous Lyapunov equation). Suppose  $W$  is stable. The solution  $Y$  of continuous Lyapunov equation

$$WY + YW^\top + Q = 0$$

can be written as

$$Y = \int_0^\infty e^{W\tau} Q e^{W^\top \tau} d\tau. \tag{A.1}$$

*Proof.* The result can be found in Theorem 7.5 of [1], so we omit its proof.  $\square$

In the following, given  $K$  such that  $A - BK$  is stable, we define two operators  $\mathcal{T}_K, \mathcal{F}_K$  on symmetric matrix  $X$  as

$$\begin{aligned} \mathcal{T}_K(X) &:= \int_0^\infty e^{(A-BK)\tau} X e^{(A-BK)^\top \tau} d\tau, \\ \mathcal{F}_K(X) &:= (A - BK)X + X(A - BK)^\top. \end{aligned}$$

Then

$$\mathcal{F}_K \circ \mathcal{T}_K + I = 0,$$

or

$$\mathcal{T}_K = -\mathcal{F}_K^{-1}.$$

Additionally, from (4) we have

$$\Sigma_K = \mathcal{T}_K(DD^\top).$$

---

<sup>\*</sup>Faculty of Business and Economics, The University of Hong Kong. <nickweichwang@gmail.com>

<sup>†</sup>Department of Mathematics, Princeton University. <jiequnh@princeton.edu>

<sup>‡</sup>Department of Operations Research & Financial Engineering, Princeton University. <zy6@princeton.edu>

<sup>§</sup>Department of Industrial Engineering & Management Sciences, Northwestern University. <zhaoran.wang@northwestern.edu>

**Lemma A.2.** (Perturbation of  $P_K$ ). Assume  $K, K'$  are both stable. Then

$$P_{K'} - P_K = \int_0^\infty e^{(A-BK')^\top \tau} [E_K^\top (K' - K) + (K' - K)^\top E_K + (K' - K)^\top R(K' - K)] e^{(A-BK')\tau} d\tau. \quad (\text{A.2})$$

Moreover, this implies that  $P_K$  is differentiable.

*Proof.* Taking the difference between two equations (7) corresponding to  $K'$  and  $K$ , we have

$$\begin{aligned} 0 &= (A - BK')^\top P_{K'} + P_{K'}(A - BK')^\top - (A - BK' + B(K - K'))^\top P_K + P_K(A - BK' + B(K - K'))^\top \\ &\quad + (K' - K + K)^\top R(K' - K + K) - K^\top R K \\ &= (A - BK')^\top (P_{K'} - P_K) + (P_{K'} - P_K)(A - BK')^\top - (K' - K)^\top B^\top P_K - P_K B(K' - K) \\ &\quad + (K' - K + K)^\top R(K' - K + K) - K^\top R K \\ &= (A - BK')^\top (P_{K'} - P_K) + (P_{K'} - P_K)(A - BK')^\top \\ &\quad + E_K^\top (K' - K) + (K' - K)^\top E_K + (K' - K)^\top R(K' - K). \end{aligned}$$

Here  $E_K = RK - B^\top P_K$  is defined in Proposition 1. In other words,  $P_{K'} - P_K$  is the solution of the continuous Lyapunov equation

$$(A - BK')^\top Y + Y(A - BK') + E_K^\top (K' - K) + (K' - K)^\top E_K + (K' - K)^\top R(K' - K) = 0,$$

in which  $Y$  is the unknown matrix. Recalling Lemma A.1, we finish the first part of the proof.

Define vectorization operator for  $n \times m$  matrix  $Y = (y_{ij})_{i \leq n, j \leq m}$  as

$$\text{vec}(Y) = (y_{11}, \dots, y_{n1}, y_{12}, \dots, y_{n2}, \dots, y_{1m}, \dots, y_{nm})^\top.$$

We have the fact that  $\text{vec}(ABC) = (C^\top \otimes A) \text{vec}(B)$ . Using this, (A.2) gives us

$$\begin{aligned} \text{vec}(P_{K'} - P_K) &= \int_0^\infty \text{vec} \left( e^{(A-BK')^\top \tau} [E_K^\top (K' - K) + (K' - K)^\top E_K + (K' - K)^\top R(K' - K)] e^{(A-BK')\tau} \right) d\tau \\ &= \int_0^\infty \left( e^{(A-BK')^\top \tau} \otimes e^{(A-BK')\tau} \right) \text{vec} [E_K^\top (K' - K) + (K' - K)^\top E_K + (K' - K)^\top R(K' - K)] \\ &= \int_0^\infty \left( e^{(A-BK')^\top \tau} \otimes e^{(A-BK')\tau} \right) \text{vec} [E_{K'}^\top (K' - K) + (K' - K)^\top E_{K'} + U], \end{aligned}$$

where

$$\begin{aligned} U &= (K' - K)^\top R(K' - K) + (E_K - E_{K'})^\top (K' - K) + (K' - K)^\top (E_K - E_{K'}) \\ &= -(K' - K)^\top R(K' - K) + (P_{K'} - P_K)B(K' - K) + (K' - K)^\top B^\top (P_{K'} - P_K) \\ &= O(\|K' - K\|_F^2). \end{aligned}$$

The last line uses the expression of  $P_{K'} - P_K$  in the first part of Lemma A.2 again. Therefore, there exists  $Z_{K'}$  that depend on  $A - BK'$  and  $E_{K'}$  such that  $\text{vec}(P_K - P_{K'}) = Z_{K'} \text{vec}(K - K') + O(\|K - K'\|_F^2)$ , where  $Z_{K'}$  will be defined as the derivative of  $\text{vec}(P_K)$  at  $K = K'$  with respect to  $\text{vec}(K)$ . Therefore,  $P_K$  is indeed differentiable and its differential  $dP_K$  used in the proof of Proposition 1 below is well-defined.  $\square$

Now we are ready to prove the expression of the policy gradient as follows.

**Proposition A.3.** (Proposition 1).

$$\nabla_K J(K) = 2(RK - B^\top P_K) \Sigma_K = 2E_K \Sigma_K, \quad (\text{A.3})$$

where  $E_K = RK - B^\top P_K$ .

*Proof.* Rewrite the Lyapunov equation (7) as  $\phi(K, P_K) = 0$ , where  $\phi$  is a function of two independent arguments, defined as

$$\phi(K, P_K) := (A - BK)^\top P_K + P_K(A - BK) + Q + K^\top RK.$$

Taking differential on both sides (the differentiability of  $P_K$  has been shown in Lemma A.2), we have

$$\begin{aligned} 0 &= \nabla_K \phi(K, P_K) dK + \nabla_{P_K} \phi(K, P_K) dP_K \\ &= [(-BdK)^\top P_K + P_K(-BdK) + (dK)^\top RK + K^\top RdK] + [(A - BK)^\top dP_K + dP_K(A - BK)], \end{aligned}$$

or equivalently,

$$(A - BK)^\top dP_K + dP_K(A - BK) + (K^\top R - P_K B) dK + (dK)^\top (RK - B^\top P_K) = 0. \quad (\text{A.4})$$

Note that (4)(A.4) have similar structures. We apply the trace operator to (4) left multiplied by  $dP_K$  and (A.4) left multiplied by  $\Sigma_K$ , and then take the difference to obtain

$$\begin{aligned} \text{tr}(dP_K DD^\top) &= \text{tr}[\Sigma_K(K^\top R - P_K B) dK + \Sigma_K(dK)^\top (RK - B^\top P_K)] \\ &= \text{tr}[2\Sigma_K(K^\top R - P_K B) dK]. \end{aligned}$$

From (8), by definition, we have

$$\text{tr}[(\nabla_K J(K))^\top dK] = dJ(K) = \text{tr}(dP_K DD^\top).$$

Comparing the above two equations, since the matrix quantities are equal for any direction of  $dK$ , we conclude  $\nabla_K J(K) = 2(RK - B^\top P_K)\Sigma_K$ .  $\square$

**Lemma A.4.** (Lemma 2). The cost function is gradient dominated [3], that is

$$J(K) - J(K^*) \leq \frac{\|\Sigma_{K^*}\|}{\sigma_{\min}(R)\sigma_{\min}^2(DD^\top)} \text{tr}(\nabla_K J(K)^\top \nabla_K J(K)). \quad (\text{A.5})$$

In additional, we have the following lower bound for  $J(K) - J(K^*)$

$$J(K) - J(K^*) \geq \frac{\sigma_{\min}(DD^\top)}{\|R\|} \text{tr}(E_K^\top E_K). \quad (\text{A.6})$$

*Proof.* Based on (8) and Lemma A.2, we have

$$\begin{aligned} &J(K') - J(K) \\ &= \text{tr}[(P_{K'} - P_K)DD^\top] \\ &= \text{tr} \left[ \int_0^\infty e^{(A-BK')^\top \tau} [E_K^\top (K' - K) + (K' - K)^\top E_K + (K' - K)^\top R(K' - K)] e^{(A-BK')\tau} DD^\top d\tau \right] \\ &= \text{tr} \left[ \int_0^\infty e^{(A-BK')\tau} DD^\top e^{(A-BK')^\top \tau} d\tau [E_K^\top (K' - K) + (K' - K)^\top E_K + (K' - K)^\top R(K' - K)] \right] \\ &= \text{tr}[\Sigma_{K'} [E_K^\top (K' - K) + (K' - K)^\top E_K + (K' - K)^\top R(K' - K)]] \\ &= \text{tr}[\Sigma_{K'} [(K' - K + R^{-1}E_K)^\top R(K' - K + R^{-1}E_K) - E_K^\top R^{-1}E_K]]. \end{aligned}$$

Here the second equality uses Lemma A.2; the fourth equality uses the fact that  $\Sigma_{K'}$  is the solution the Lyapunov equation  $(A - BK')X + X(A - BK)^\top + DD^\top = 0$  and Lemma A.1.

To prove the upper bound (A.5), we use the fact that the quadratic term  $(K' - K + R^{-1}E_K)^\top R(K' - K + R^{-1}E_K)$  above is positive semi-definite. Letting  $K' = K^*$ , we have

$$\begin{aligned}
J(K) - J(K^*) &= \text{tr}[\Sigma_{K^*}[E_K^\top R^{-1}E_K - (K^* - K + R^{-1}E_K)^\top R(K^* - K + R^{-1}E_K)]] \\
&\leq \text{tr}[\Sigma_{K^*}E_K^\top R^{-1}E_K] \\
&\leq \frac{\|\Sigma_{K^*}\|}{\sigma_{\min}(R)} \text{tr}(E_K^\top E_K) \\
&\leq \frac{\|\Sigma_{K^*}\|}{\sigma_{\min}(R)\sigma_{\min}^2(\Sigma_K)} \text{tr}(\nabla_K J(K)^\top \nabla_K J(K)) \\
&\leq \frac{\|\Sigma_{K^*}\|}{\sigma_{\min}(R)\sigma_{\min}^2(DD^\top)} \text{tr}(\nabla_K J(K)^\top \nabla_K J(K)).
\end{aligned}$$

The last inequality follows from the fact that  $\Sigma_K \succeq DD^\top \succeq \sigma_{\min}(DD^\top) \cdot I_d$ .

To prove the lower bound, we choose a specific form of  $K'$  to make the quadratic term to be zero and use the fact that  $J(K^*) \leq J(K')$ . Letting  $K' = K - R^{-1}E_K$ , we have

$$J(K) - J(K') = \text{tr}[\Sigma_{K'}E_K^\top R^{-1}E_K].$$

Then

$$\begin{aligned}
J(K) - J(K^*) &\geq J(K) - J(K') \\
&\geq \text{tr}[\Sigma_{K'}E_K^\top R^{-1}E_K] \\
&\geq \frac{\sigma_{\min}(DD^\top)}{\|R\|} \text{tr}(E_K^\top E_K).
\end{aligned}$$

□

**Lemma A.5.** (Perturbation analysis of  $\Sigma_K$ ) Suppose  $A - BK$  is stable and

$$\|K' - K\| \leq \frac{\sigma_{\min}(Q)\sigma_{\min}(DD^\top)}{4J(K)\|B\|},$$

then  $A - BK'$  is also stable and

$$\|\Sigma_{K'} - \Sigma_K\| \leq 4 \left( \frac{J(K)}{\sigma_{\min}(Q)} \right)^2 \frac{\|B\|}{\sigma_{\min}(DD^\top)} \|K' - K\|.$$

*Proof.* The first claim is easy to prove with Lemma 10 in [4]. The second claim is similar to Appendix C.4 in [2]. We first claim

$$\|\Sigma_K\| \leq \frac{J(K)}{\sigma_{\min}(Q)} \text{ and } \|\mathcal{T}_K\| \leq \frac{\|\Sigma_K\|}{\sigma_{\min}(DD^\top)}, \quad (\text{A.7})$$

and it is clear to see that

$$\|\mathcal{F}_{K'} - \mathcal{F}_K\| \leq 2\|B\|\|K' - K\|.$$

Then

$$\|\mathcal{T}_K\|\|\mathcal{F}_{K'} - \mathcal{F}_K\| \leq \frac{2J(K)\|B\|\|K' - K\|}{\sigma_{\min}(Q)\sigma_{\min}(DD^\top)} \leq \frac{1}{2}.$$

Then we have

$$\begin{aligned}\|\Sigma_{K'} - \Sigma_K\| &= \|(\mathcal{T}_{K'} - \mathcal{T}_K)(DD^\top)\| \leq \|\mathcal{T}_K\| \|\mathcal{F}_{K'} - \mathcal{F}_K\| \|\Sigma_{K'}\| \\ &\leq \|\mathcal{T}_K\| \|\mathcal{F}_{K'} - \mathcal{F}_K\| (\|\Sigma_K\| + \|\Sigma_{K'} - \Sigma_K\|)\end{aligned}$$

Therefore,

$$\begin{aligned}\|\Sigma_{K'} - \Sigma_K\| &\leq 2\|\mathcal{T}_K\| \|\mathcal{F}_{K'} - \mathcal{F}_K\| \|\Sigma_K\| \\ &\leq 4 \left( \frac{J(K)}{\sigma_{\min}(Q)} \right)^2 \frac{\|B\|}{\sigma_{\min}(DD^\top)} \|K' - K\|.\end{aligned}$$

So it remains to show the claim in (A.7). The first claim can be seen from

$$J(K) = \text{tr}(\Sigma_K(Q + K^\top RK)) \geq \text{tr}(\Sigma_K)\sigma_{\min}(Q) \geq \|\Sigma_K\|\sigma_{\min}(Q).$$

The second claim can be shown from the following fact. For any unit vector  $v \in \mathbb{R}^d$  and unit spectral norm matrix  $X$ ,

$$\begin{aligned}v^\top \mathcal{T}_K(X)v &= \int_0^\infty \text{tr}(X e^{(A-BK)^\top \tau} v v^\top e^{(A-BK)\tau}) d\tau \\ &\leq \int_0^\infty \text{tr}(DD^\top e^{(A-BK)^\top \tau} v v^\top e^{(A-BK)\tau}) d\tau \cdot \|(DD^\top)^{-1/2} X (DD^\top)^{-1/2}\| \\ &= (v^\top \Sigma_K v) \cdot \|(DD^\top)^{-1/2} X (DD^\top)^{-1/2}\| \leq \|\Sigma_K\| \sigma_{\min}^{-1}(DD^\top).\end{aligned}$$

We now complete the proof. □

**Lemma A.6.** (Estimate of one-step GD). Suppose  $K' = K - \eta \nabla_K J(K)$  with

$$\eta \leq \min \left\{ \frac{3\sigma_{\min}(Q)}{8J(K)\|R\|}, \frac{1}{16} \left( \frac{\sigma_{\min}(Q)\sigma_{\min}(DD^\top)}{J(K)} \right)^2 \frac{1}{\|B\| \|\nabla_K J(K)\|} \right\},$$

then

$$J(K') - J(K^*) \leq \left( 1 - \eta \frac{\sigma_{\min}(R)\sigma_{\min}^2(DD^\top)}{\|\Sigma_{K^*}\|} \right) (J(K) - J(K^*)).$$

*Proof.* By the proof of Lemma 2, we have

$$\begin{aligned}&J(K) - J(K') \\ &= 2 \text{tr}[\Sigma_{K'}(K - K')^\top E_K] - \text{tr}[\Sigma_{K'}(K - K')^\top R(K - K')] \\ &= 4\eta \text{tr}(\Sigma_{K'} \Sigma_K E_K^\top E_K) - 4\eta^2 \text{tr}(\Sigma_K \Sigma_{K'} \Sigma_K E_K^\top R E_K) \\ &\geq 4\eta \text{tr}(\Sigma_K E_K^\top E_K \Sigma_K) - 4\eta \|\Sigma_{K'} - \Sigma_K\| \text{tr}(\Sigma_K E_K^\top E_K) - 4\eta^2 \|\Sigma_{K'}\| \|R\| \text{tr}(\Sigma_K E_K^\top E_K \Sigma_K) \\ &\geq 4\eta \text{tr}(\Sigma_K E_K^\top E_K \Sigma_K) - 4\eta \frac{\|\Sigma_{K'} - \Sigma_K\|}{\sigma_{\min}(\Sigma_K)} \text{tr}(\Sigma_K E_K^\top E_K \Sigma_K) - 4\eta^2 \|\Sigma_{K'}\| \|R\| \text{tr}(\Sigma_K E_K^\top E_K \Sigma_K) \\ &= 4\eta \left( 1 - \frac{\|\Sigma_{K'} - \Sigma_K\|}{\sigma_{\min}(\Sigma_K)} - \eta \|\Sigma_{K'}\| \|R\| \right) \text{tr}(\nabla_K J(K)^\top \nabla_K J(K)) \\ &\geq 4\eta \frac{\sigma_{\min}(R)\sigma_{\min}^2(DD^\top)}{\|\Sigma_{K^*}\|} \left( 1 - \frac{\|\Sigma_{K'} - \Sigma_K\|}{\sigma_{\min}(DD^\top)} - \eta \|\Sigma_{K'}\| \|R\| \right) (J(K) - J(K^*)).\end{aligned}$$

The condition on  $\eta$  ensures

$$\|K' - K\| \leq \frac{\sigma_{\min}(Q)\sigma_{\min}(DD^\top)}{4J(K)\|B\|},$$

so by Lemma A.5,

$$\frac{\|\Sigma_{K'} - \Sigma_K\|}{\sigma_{\min}(DD^\top)} \leq 4\eta \left( \frac{J(K)}{\sigma_{\min}(Q)\sigma_{\min}(DD^\top)} \right)^2 \|B\| \|\nabla_K J(K)\| \leq \frac{1}{4},$$

with the assumed  $\eta$ . Then

$$\|\Sigma_{K'}\| \leq \|\Sigma_K\| + \|\Sigma_{K'} - \Sigma_K\| \leq \frac{J(K)}{\sigma_{\min}(Q)} + \frac{\sigma_{\min}(DD^\top)}{4} \leq \frac{J(K)}{\sigma_{\min}(Q)} + \frac{\|\Sigma_{K'}\|}{4},$$

which implies  $\|\Sigma_{K'}\| \leq \frac{4J(K)}{3\sigma_{\min}(Q)}$ . Hence,

$$1 - \frac{\|\Sigma_{K'} - \Sigma_K\|}{\sigma_{\min}(DD^\top)} - \eta\|\Sigma_{K'}\|\|R\| \geq 1 - \frac{1}{4} - \eta \frac{4J(K)\|R\|}{3\sigma_{\min}(Q)} \geq \frac{1}{4},$$

with the assumed  $\eta$ . Now we have

$$J(K) - J(K') \geq \eta \frac{\sigma_{\min}(R)\sigma_{\min}^2(DD^\top)}{\|\Sigma_{K^*}\|} (J(K) - J(K^*)),$$

which is equivalent to the desired conclusion.  $\square$

**Theorem A.7.** (Theorem 3). With an appropriate constant setting of the stepsize  $\eta$  in the form of

$$\eta = \text{poly} \left( \frac{\sigma_{\min}(Q)}{C(K_0)}, \sigma_{\min}(DD^\top), \frac{1}{\|B\|}, \frac{1}{\|R\|} \right),$$

and number of iterations

$$N \geq \frac{\|\Sigma_{K^*}\|}{\eta\sigma_{\min}^2(DD^\top)\sigma_{\min}(R)} \log \frac{J(K_0) - J(K^*)}{\varepsilon},$$

the iterates of gradient descent enjoys

$$J(K_N) - J(K^*) \leq \varepsilon.$$

*Proof.* Iterating the gradient decent for  $N$  times, from Lemma A.6, we know

$$J(K_N) - J(K^*) \leq \left( 1 - \eta \frac{\sigma_{\min}(R)\sigma_{\min}^2(DD^\top)}{\|\Sigma_{K^*}\|} \right)^N (J(K_0) - J(K^*)).$$

Therefore, if  $N$  is chosen as the above, we can make the right hand side smaller than  $\varepsilon$ .  $\square$

## B Proofs for Section 4

**Proposition B.1.** (Proposition 4). Assume  $A - BK$  is stable. The optimal intercept  $b^K$  to minimize  $J_2(K, b)$  for any given  $K$  is that

$$b^K = -(KQ^{-1}A^\top + R^{-1}B^\top)(AQ^{-1}A^\top + BR^{-1}B^\top)^{-1}a \quad (\text{B.1})$$

Furthermore,  $J_2(K, b^K)$  takes the form of

$$J_2(K, b^K) = a^\top (AQ^{-1}A^\top + BR^{-1}B^\top)^{-1}a \quad (\text{B.2})$$

which is independent of  $K$ .

*Proof.* The problem of  $\min_b J_2(K, b)$  is equivalent to the following constrained optimization

$$\begin{aligned} & \min \begin{pmatrix} \mu \\ b \end{pmatrix}^\top \begin{pmatrix} Q + K^\top RK & -K^\top R \\ -RK & R \end{pmatrix} \begin{pmatrix} \mu \\ b \end{pmatrix} \\ & \text{s.t. } (A - BK)\mu + (a + Bb) = 0 \end{aligned} \quad (\text{B.3})$$

Using the Lagrangian multiplier method, we have

$$2M \begin{pmatrix} \mu \\ b \end{pmatrix} + N\lambda = 0, \quad N^\top \begin{pmatrix} \mu \\ b \end{pmatrix} + a = 0,$$

where

$$M = \begin{pmatrix} Q + K^\top RK & -K^\top R \\ -RK & R \end{pmatrix}, \quad N = \begin{pmatrix} (A - BK)^\top \\ B^\top \end{pmatrix}.$$

From the first equation we get  $(\mu^\top, b^\top)^\top = -M^{-1}N\lambda/2$ . Plugging this into the second equation, we derive  $\lambda = -2(N^\top M^{-1}N)^{-1}a$ . Therefore, the optimal  $(\mu^K, b^K)$  is

$$\begin{pmatrix} \mu^K \\ b^K \end{pmatrix} = -M^{-1}N(N^\top M^{-1}N)^{-1}a.$$

And the optimal value of  $J_2(K, b)$  is  $J_2(K, b^K) = a^\top (N^\top M^{-1}N)^{-1}a$ . By some simple calculation,

$$M^{-1} = \begin{pmatrix} Q^{-1} & -Q^{-1}K^\top \\ -KQ^{-1} & KQ^{-1}K^\top + R^{-1} \end{pmatrix},$$

and  $N^\top M^{-1}N = AQ^{-1}A^\top + BR^{-1}B^\top$ . Therefore, the final optimal

$$\begin{pmatrix} \mu^K \\ b^K \end{pmatrix} = - \begin{pmatrix} Q^{-1}A^\top \\ KQ^{-1}A^\top + R^{-1}B^\top \end{pmatrix} (AQ^{-1}A^\top + BR^{-1}B^\top)^{-1}a.$$

We have assumed  $M$  and  $N^\top M^{-1}N$  are non-singular above. We now rigorously show that they are indeed invertible. Specifically, if  $M$  is singular,  $\exists x = (x_1^\top, x_2^\top)^\top \neq 0$  but  $x^\top Mx = 0$ . Since  $Q \succ 0$ , we have  $x_1 = 0$ . Since  $R \succ 0$ , we have  $-Kx_1 + x_2 = 0$ , thus  $x_2 = 0$ . Then we get a contradiction. If  $N^\top M^{-1}N$  is singular,  $\exists x \neq 0$ , but  $Nx = 0$ , which leads to  $(A - BK)x = 0$ . Given that  $A - BK$  is stable, this implies  $x = 0$ , again we get a contradiction. The proof is now complete.  $\square$

**Theorem B.2.** (Theorem 5). With the stepsize  $\eta$  in the form of

$$\eta = \text{poly} \left( \frac{\sigma_{\min}(Q)}{C(K_0)}, \sigma_{\min}(DD^\top), \frac{1}{\|B\|}, \frac{1}{\|R\|} \right),$$

and number of iterations

$$N \geq \frac{\|\Sigma_{K^*}\|}{\eta \sigma_{\min}^2(DD^\top) \sigma_{\min}(R)} \log \frac{J_1(K_0) - J_1(K^*)}{\varepsilon},$$

the iterates of gradient descent enjoys  $J_1(K_N) - J_1(K^*) \leq \varepsilon$ . If we follow  $b^K = -(KQ^{-1}A^\top + R^{-1}B^\top)(AQ^{-1}A^\top + BR^{-1}B^\top)^{-1}a$ , we have

$$J(K_N, b^{K_N}) - J(K^*, b^*) \leq \varepsilon.$$

Furthermore,

$$\|K_N - K^*\|_F \leq \sigma_{\min}^{-1/2}(R) \sigma_{\min}^{-1/2}(DD^\top) \sqrt{\varepsilon}, \quad \|b^{K_N} - b^*\|_2 \leq C_b(a) \sigma_{\min}^{-1/2}(R) \sigma_{\min}^{-1/2}(DD^\top) \sqrt{\varepsilon}, \quad (\text{B.4})$$

where  $C_b(a) = \|Q^{-1}A^\top(AQ^{-1}A^\top + BR^{-1}B^\top)^{-1}a\|_2$  is a constant depending on the intercept  $a$ .

*Proof.* We only need to show the bound for  $K_N$  and  $b^{K_N}$  in (B.4). From the proof of Lemma 2, we showed that for any  $K, K'$ ,

$$J_1(K) - J_1(K') = \text{tr}[\Sigma_K[E_{K'}^\top(K - K') + (K - K')^\top E_{K'} + (K - K')^\top R(K - K')]].$$

Choosing  $K' = K^*$ , since  $E_{K^*} = 0$ , we get

$$J_1(K) - J_1(K^*) = \text{tr}[\Sigma_K(K - K^*)^\top R(K - K^*)] \geq \sigma_{\min}(R), \sigma_{\min}(DD^\top) \|K_N - K^*\|_F^2.$$

Therefore, if  $(K_N, b^{K_N})$  makes  $J(K_N, b^{K_N}) - J(K^*, b^*) = J_1(K) - J_1(K^*) \leq \varepsilon$ , we surely obtain  $\|K_N - K^*\|_F^2 \leq \sigma_{\min}^{-1}(R)\sigma_{\min}^{-1}(DD^\top)\varepsilon$ .

The bound for  $b^{K_N}$  is straightforward as

$$\begin{aligned} \|b^{K_N} - b^*\|_2 &\leq \|K_N - K^*\|_2 \|Q^{-1}A^\top(AQ^{-1}A^\top + BR^{-1}B^\top)^{-1}a\|_2 \\ &\leq C_b(a) \|K_N - K^*\|_F \leq C_b(a) \sigma_{\min}^{-1/2}(R)\sigma_{\min}^{-1/2}(DD^\top)\sqrt{\varepsilon}. \end{aligned}$$

□

## C Proofs for Section 5

**Proposition C.1.** (Proposition 8). Under Assumption 7, the operator  $\Lambda(\cdot) = \Lambda_2(\cdot, \Lambda_1(\cdot))$  is  $L_0$ -Lipschitz, where  $L_0$  is given in Assumption 7. Moreover, there exists a unique Nash equilibrium pair  $(\mu^*, \pi^*)$  of the MFG.

*Proof.* Consider the linear policies  $\pi_{K,b}(x) = -Kx + b$ . Define the distance metric of the linear policy as follows

$$d(\pi_{K_1, b_1}, \pi_{K_2, b_2}) = \|K_1 - K_2\|_2 + \|b_1 - b_2\|_2. \quad (\text{C.1})$$

Then for the mapping  $\Lambda_1(\mu)$ , as the optimal  $K^*$  does not depend on  $\mu$ , we have for any  $\mu_1, \mu_2 \in \mathbb{R}^{d+k}$ ,

$$\begin{aligned} d(\Lambda_1(\mu_1), \Lambda_2(\mu_2)) &= \|b_{1,\mu}^* - b_{2,\mu}^*\|_2 \\ &\leq \|K^*Q^{-1}A^\top + R^{-1}B^\top\|_2 \left( \|(AQ^{-1}A^\top + BR^{-1}B^\top)^{-1}\bar{A}\|_2 \|\mu_{1,x} - \mu_{2,x}\|_2 \right. \\ &\quad \left. + \|(AQ^{-1}A^\top + BR^{-1}B^\top)^{-1}\bar{B}\|_2 \|\mu_{1,u} - \mu_{2,u}\|_2 \right) \\ &\leq L_1(\|\mu_{1,x} - \mu_{2,x}\|_2 + \|\mu_{1,u} - \mu_{2,u}\|_2) = L_1\|\mu_1 - \mu_2\|_2. \end{aligned} \quad (\text{C.2})$$

For the mapping  $\Lambda_2(\mu, \pi)$ , with the same optimal policy  $\pi \in \Pi$  under some  $\mu \in \mathbb{R}^{d+k}$ , for any  $\mu_1, \mu_2 \in \mathbb{R}^{d+k}$ , it holds that

$$\begin{aligned} \|\Lambda_2(\mu_1, \pi) - \Lambda_2(\mu_2, \pi)\|_2 &= \|\mu_{\text{new},x}(\mu_1) - \mu_{\text{new},x}(\mu_2)\|_2 + \|\mu_{\text{new},u}(\mu_1) - \mu_{\text{new},u}(\mu_2)\|_2 \\ &\leq \|(A - BK^*)^{-1}\bar{A}\|_2 \|\mu_{1,x} - \mu_{2,x}\|_2 \\ &\quad + \|(A - BK^*)^{-1}\bar{B}\|_2 \|\mu_{1,u} - \mu_{2,u}\|_2 \\ &\quad + \|K^*(A - BK^*)^{-1}\bar{A}\|_2 \|\mu_{1,x} - \mu_{2,x}\|_2 \\ &\quad + \|K^*(A - BK^*)^{-1}\bar{B}\|_2 \|\mu_{1,u} - \mu_{2,u}\|_2 \\ &\leq L_2(\|\mu_{1,x} - \mu_{2,x}\|_2 + \|\mu_{1,u} - \mu_{2,u}\|_2) = L_2\|\mu_1 - \mu_2\|_2. \end{aligned} \quad (\text{C.3})$$



With the same mean-field variable  $\mu$ , since any two optimal policies  $\pi_1$  and  $\pi_2$  share the same  $K^*$ , we also have the following bound

$$\begin{aligned} \|\Lambda_2(\mu, \pi_1) - \Lambda_2(\mu, \pi_2)\|_2 &\leq \left( \|(A - BK^*)^{-1}B\|_2 + \|I + K^*(A - BK^*)^{-1}B\|_2 \right) \|b_{\pi_1} - b_{\pi_2}\|_2 \\ &= L_3 \|b_{\pi_1} - b_{\pi_2}\|_2. \end{aligned} \quad (\text{C.4})$$

Therefore, combining (C.2), (C.3), (C.4), we obtain for any  $\mu_1, \mu_2 \in \mathbb{R}^{d+k}$ ,

$$\begin{aligned} \|\Lambda(\mu_1) - \Lambda(\mu_2)\|_2 &= \|\Lambda_2(\mu_1, \Lambda_1(\mu_1)) - \Lambda_2(\mu_2, \Lambda_1(\mu_2))\|_2 \\ &\leq \|\Lambda_2(\mu_1, \Lambda_1(\mu_1)) - \Lambda_2(\mu_1, \Lambda_1(\mu_2))\|_2 + \|\Lambda_2(\mu_1, \Lambda_1(\mu_2)) - \Lambda_2(\mu_2, \Lambda_1(\mu_2))\|_2 \\ &\leq L_3 d(\Lambda_1(\mu_1), \Lambda_1(\mu_2)) + L_2 \|\mu_1 - \mu_2\|_2 \\ &\leq (L_1 L_3 + L_2) \|\mu_1 - \mu_2\|_2 = L_0 \|\mu_1 - \mu_2\|_2. \end{aligned} \quad (\text{C.5})$$

So given the assumption that  $L_0 < 1$ , the operator  $\Lambda(\cdot)$  is a contraction. By Banach fixed-point theorem, we conclude that  $\Lambda(\cdot)$  has a unique fixed point, which gives the unique Nash equilibrium pair. This completes the proof of the proposition.  $\square$

**Theorem C.2.** (Theorem 9). For a sufficiently small tolerance  $0 < \varepsilon < 1$ , we choose the number of iterations  $S$  in Algorithm 1 such that

$$S \geq \frac{\log(2\|\mu_0 - \mu^*\|_2 \cdot \varepsilon^{-1})}{\log(1/L_0)}. \quad (\text{C.6})$$

For any  $s = 0, 1, \dots, S - 1$ , define

$$\varepsilon_s = \min \left\{ 2^{-2} \|B\|_2^{-2} \|(A - BK^*)^{-1}\|_2^{-2}, C_b(\mu_s)^{-2} \varepsilon^2, \right. \quad (\text{C.7})$$

$$\left. 2^{-2s-4} (L_3 C_b(\mu_s) + 2C_K(\mu_2))^{-2} \varepsilon^2, \varepsilon^2 \right\} \cdot \sigma_{\min}(R) \sigma_{\min}(DD^\top), \quad (\text{C.8})$$

where

$$C_b(\mu_s) = \|Q^{-1}A^\top(AQ^{-1}A^\top + BR^{-1}B^\top)^{-1}\tilde{\alpha}_{\mu_s}\|_2, \quad (\text{C.9})$$

$$\begin{aligned} C_K(\mu_s) &= \left( \|\tilde{\alpha}_{\mu_s}\|_2 + (1 + L_1 \|\mu_s\|_2) \|B\|_2 \right) \\ &\quad \cdot \left( \|(A - BK^*)^{-1}\|_2 + (1 + \|K^*\|_2) \|(A - BK^*)^{-1}\|_2^2 \|B\|_2 \right). \end{aligned} \quad (\text{C.10})$$

In the  $s$ -th policy update, we choose the stepsize  $\eta$  as in Theorem 5 and number of iterations

$$N_s \geq \frac{\|\Sigma_{K^*}\|}{\eta \sigma_{\min}^2(DD^\top) \sigma_{\min}(R)} \log \frac{J_{\mu_s,1}(K_{\pi_s}) - J_{\mu_s,1}(K^*)}{\varepsilon_s},$$

such that  $J_{\mu_s}(K_{\pi_{s+1}}, b_{\pi_{s+1}}) - J_{\mu_s}(K^*, b_{\mu_s}^*) \leq \varepsilon_s$  where  $K^*, b_{\mu_s}^*$  are parameters of the optimal policy  $\pi_{\mu_s}^* = \Lambda_1(\mu_s)$  generated from mean-field state/action  $\mu_s$ ,  $J_{\mu_s}(K_\pi, b_\pi) = J_{\mu_s}(\pi)$  is defined in the drifted MFG problem (17), and  $J_{\mu_s,1}(K_\pi)$  is defined in (14) corresponding to  $J_{\mu_s}(K_\pi, b_\pi)$ . Then it holds that

$$\|\mu_S - \mu^*\|_2 \leq \varepsilon, \quad \|K_{\pi_S} - K^*\|_F \leq \varepsilon, \quad \|b_{\pi_S} - b^*\|_2 \leq (1 + L_1)\varepsilon. \quad (\text{C.11})$$

Here  $\mu^*$  is the Hash mean-field state/action,  $K_{\pi_S}, b_{\pi_S}$  are parameters of the final output policy  $\pi_S$ , and  $K^*, b^*$  are the parameters of the Nash policy  $\pi^* = \Lambda_1(\mu^*)$ .

*Proof.* Define  $\mu_{s+1}^* = \Lambda(\mu_s)$  as the mean-field state/action generated by the optimal policy  $\pi_{\mu_s}^* = \Lambda_1(\mu_s)$ . Then by (19) and (20), we know that  $\mu_{s+1}^* = (\mu_{s+1,x}^*, \mu_{s+1,u}^*)^\top$ , and

$$\begin{aligned}\mu_{s+1,x}^* &= -(A - BK^*)^{-1}(Bb_{\mu_s}^* + \tilde{\alpha}_{\mu_s}), \\ \mu_{s+1,u}^* &= b_{\mu_s}^* + K^*(A - BK^*)^{-1}(Bb_{\mu_s}^* + \tilde{\alpha}_{\mu_s}).\end{aligned}$$

Therefore, by triangle inequality,

$$\|\mu_{s+1} - \mu^*\|_2 \leq \|\mu_{s+1} - \mu_{s+1}^*\|_2 + \|\mu_{s+1}^* - \mu^*\|_2 = E_1 + E_2. \quad (\text{C.12})$$

Next we bound  $E_1$  and  $E_2$  separately.

The bound for  $E_2$  is straightforward. From Proposition 8, we have

$$E_2 = \|\mu_{s+1}^* - \mu^*\|_2 = \|\Lambda(\mu_s) - \Lambda(\mu^*)\|_2 \leq L_0 \|\mu_s^* - \mu^*\|_2,$$

where  $L_0 = L_1 L_3 + L_2$  is defined in Assumption 7.

The bound for  $E_1$  is more involved.

$$\begin{aligned}E_1 &= \|\mu_{s+1} - \mu_{s+1}^*\|_2 = \|\mu_{s+1,x} - \mu_{s+1,x}^*\|_2 + \|\mu_{s+1,u} - \mu_{s+1,u}^*\|_2 \\ &\leq \left( \|(A - BK^*)^{-1}B\|_2 + \|I + K^*(A - BK^*)^{-1}B\|_2 \right) \|b_{\pi_{s+1}} - b_{\mu_s}^*\|_2 \\ &\quad + \|Bb_{\pi_{s+1}} + \tilde{\alpha}_{\mu_s}\|_2 \left( \|(A - BK_{\pi_{s+1}})^{-1} - (A - BK^*)^{-1}\|_2 \right. \\ &\quad \left. + \|K_{\pi_{s+1}}(A - BK_{\pi_{s+1}})^{-1} - K^*(A - BK^*)^{-1}\|_2 \right) = F_1 + F_2.\end{aligned}$$

From Theorem 5, we have  $\|b_{\pi_{s+1}} - b_{\mu_s}^*\|_2 \leq C_b(\mu_s) \sigma_{\min}^{-1/2}(R) \sigma_{\min}^{-1/2}(DD^\top) \sqrt{\varepsilon_s}$ , where  $C_b(\mu_s) = \|Q^{-1}A^\top(AQ^{-1}A^\top + BR^{-1}B^\top)^{-1}\tilde{\alpha}_{\mu_s}\|_2$ . So

$$F_1 \leq L_3 C_b(\mu_s) \sigma_{\min}^{-1/2}(R) \sigma_{\min}^{-1/2}(DD^\top) \sqrt{\varepsilon_s}. \quad (\text{C.13})$$

Recall that  $L_3 = \|(A - BK^*)^{-1}B\|_2 + \|I + K^*(A - BK^*)^{-1}B\|_2$  is defined in Assumption 7. Now let us bound  $F_2$ .

Firstly,

$$\begin{aligned}\|Bb_{\pi_{s+1}} + \tilde{\alpha}_{\mu_s}\|_2 &\leq \|Bb_{\mu_s}^* + \tilde{\alpha}_{\mu_s}\|_2 + \|B\|_2 \|b_{\pi_{s+1}} - b_{\mu_s}^*\|_2 \\ &\leq (\|\tilde{\alpha}_{\mu_s}\|_2 + L_1 \|B\|_2 \|\mu_s\|_2) + \|B\|_2 C_b(\mu_s) \sigma_{\min}^{-1/2}(R) \sigma_{\min}^{-1/2}(DD^\top) \sqrt{\varepsilon_s} \\ &\leq \|\tilde{\alpha}_{\mu_s}\|_2 + (L_1 \|\mu_s\|_2 + 1) \|B\|_2,\end{aligned}$$

if we choose  $\varepsilon_s$  such that  $C_b(\mu_s) \sigma_{\min}^{-1/2}(R) \sigma_{\min}^{-1/2}(DD^\top) \sqrt{\varepsilon_s} \leq 1$ . The second inequality is due to  $L_1$ -Lipschitz of  $\Lambda_1(\cdot)$ . Secondly,

$$\|(A - BK_{\pi_{s+1}})^{-1} - (A - BK^*)^{-1}\|_2 \leq \|(A - BK_{\pi_{s+1}})^{-1}\|_2 \|(A - BK^*)^{-1}\|_2 \|B(K_{\pi_{s+1}} - K^*)\|_2.$$

Therefore,

$$\begin{aligned}\|(A - BK_{\pi_{s+1}})^{-1} - (A - BK^*)^{-1}\|_2 &\leq \frac{\|(A - BK^*)^{-1}\|_2^2 \|B\|_2 \|K_{\pi_{s+1}} - K^*\|_2}{1 - \|(A - BK^*)^{-1}\|_2 \|B\|_2 \|K_{\pi_{s+1}} - K^*\|_2} \\ &\leq 2 \|(A - BK^*)^{-1}\|_2^2 \|B\|_2 \|K_{\pi_{s+1}} - K^*\|_2,\end{aligned}$$

if we choose  $\varepsilon_s$  such that  $\|(A-BK^*)^{-1}\|_2\|B\|_2\|K_{\pi_{s+1}}-K^*\|_2 \leq \|(A-BK^*)^{-1}\|_2\|B\|_2\sigma_{\min}^{-1/2}(R)\sigma_{\min}^{-1/2}(DD^\top)\sqrt{\varepsilon_s} \leq 1/2$  where we use the bound  $\|K_{\pi_{s+1}}-K^*\|_2 \leq \sigma_{\min}^{-1/2}(R)\sigma_{\min}^{-1/2}(DD^\top)\sqrt{\varepsilon_s}$  from Theorem 5. Lastly,

$$\begin{aligned} & \|K_{\pi_{s+1}}(A-BK_{\pi_{s+1}})^{-1}-K^*(A-BK^*)^{-1}\|_2 \\ & \leq \|K_{\pi_{s+1}}-K^*\|_2\|(A-BK_{\pi_{s+1}})^{-1}\|_2+\|K^*\|_2\|(A-BK_{\pi_{s+1}})^{-1}-(A-BK^*)^{-1}\|_2 \\ & \leq \|K_{\pi_{s+1}}-K^*\|_2\|(A-BK_{\pi_{s+1}})^{-1}\|_2+2\|K^*\|_2\|(A-BK^*)^{-1}\|_2^2\|B\|_2\|K_{\pi_{s+1}}-K^*\|_2 \\ & \leq 2\|K_{\pi_{s+1}}-K^*\|_2\|(A-BK^*)^{-1}\|_2+2\|K^*\|_2\|(A-BK^*)^{-1}\|_2^2\|B\|_2\|K_{\pi_{s+1}}-K^*\|_2, \end{aligned}$$

where the last inequality assumes  $\|(A-BK^*)^{-1}\|_2\|B\|_2\|K_{\pi_{s+1}}-K^*\|_2 \leq 1/2$  again. Combing the above derivations, we reach the following bound for  $F_2$

$$F_2 \leq 2C_K(\mu_s)\|K_{\pi_{s+1}}-K^*\|_2 \leq 2C_K(\mu_s)\sigma_{\min}^{-1/2}(R)\sigma_{\min}^{-1/2}(DD^\top)\sqrt{\varepsilon_s}, \quad (\text{C.14})$$

where

$$C_K(\mu_s) = \left( \|\tilde{\alpha}_{\mu_s}\|_2 + (1+L_1\|\mu_s\|_2)\|B\|_2 \right) \left( \|(A-BK^*)^{-1}\|_2 + (1+\|K^*\|_2)\|(A-BK^*)^{-1}\|_2^2\|B\|_2 \right).$$

Combining the bounds (C.13) and (C.14), we have

$$E_1 \leq (L_3C_b(\mu_s) + 2C_K(\mu_s))\sigma_{\min}^{-1/2}(R)\sigma_{\min}^{-1/2}(DD^\top)\sqrt{\varepsilon_s}.$$

Finally, we hope to choose  $\varepsilon_s$  such that  $E_1 \leq \varepsilon \cdot 2^{-s-2}$ , which will be sufficient to prove the theorem. Therefore, we just need to set  $\varepsilon_s$  as follows

$$\begin{aligned} \varepsilon_s = \min & \left\{ 2^{-2}\|B\|_2^{-2}\|(A-BK^*)^{-1}\|_2^{-2}, C_b(\mu_s)^{-2}, \right. \\ & \left. 2^{-2s-4}(L_3C_b(\mu_s) + 2C_K(\mu_s))^{-2}\varepsilon^2 \right\} \cdot \sigma_{\min}(R)\sigma_{\min}(DD^\top). \end{aligned}$$

With the bounds of  $E_1$  and  $E_2$ , we have shown from (C.12) that

$$\|\mu_{s+1}-\mu^*\|_2 \leq L_0\|\mu_s-\mu^*\|_2 + \varepsilon \cdot 2^{-s-2}. \quad (\text{C.15})$$

Iterating over  $s$  and noting that  $L_0 < 1$ , we have

$$\|\mu_S-\mu^*\|_2 \leq L_0^S\|\mu_0-\mu^*\|_2 + \varepsilon/2.$$

Therefore, if we choose  $S > \log(2\|\mu_0-\mu^*\|_2 \cdot \varepsilon^{-1})/\log(1/L_0)$ , we have  $\|\mu_S-\mu^*\|_2 < \varepsilon$ .

Finally we show the bounds for  $K_{\pi_S}$  and  $b_{\pi_S}$ . Since  $K^*$  does not depend on  $\mu_s$ , for any iteration  $s$  including the last iteration  $S$ , we directly get

$$\|K_{\pi_S}-K^*\|_F \leq \sigma_{\min}^{-1/2}(R)\sigma_{\min}^{-1/2}(DD^\top)\sqrt{\varepsilon_S} \leq \varepsilon, \quad (\text{C.16})$$

from Theorem 5. By the triangle inequality,

$$\begin{aligned} \|b_{\pi_S}-b^*\|_2 & \leq \|b_{\pi_S}-b_{\mu_S}^*\|_2 + \|b_{\mu_S}^*-b^*\|_2 \\ & \leq C_b(\mu_S)\sigma_{\min}^{-1/2}(R)\sigma_{\min}^{-1/2}(DD^\top)\sqrt{\varepsilon_S} + L_1\|\mu_S-\mu^*\|_2 \\ & \leq (1+L_1)\varepsilon, \end{aligned} \quad (\text{C.17})$$

where the second inequality comes from Theorem 5 and the last inequality comes from the choice of  $\varepsilon_S$ . Thus we now complete the proof of the theorem.  $\square$

## References

- [1] Panos J Antsaklis and Anthony N Michel. *Linear systems*. Springer Science & Business Media, 2006.
- [2] Maryam Fazel, Rong Ge, Sham M Kakade, and Mehran Mesbahi. Global convergence of policy gradient methods for the linear quadratic regulator. *arXiv preprint arXiv:1801.05039*, 2018.
- [3] Hamed Karimi, Julie Nutini, and Mark Schmidt. Linear convergence of gradient and proximal-gradient methods under the polyak-lojasiewicz condition. In *Joint European Conference on Machine Learning and Knowledge Discovery in Databases*, pages 795–811. Springer, 2016.
- [4] Hesameddin Mohammadi, Armin Zare, Mahdi Soltanolkotabi, and Mihailo R Jovanović. Convergence and sample complexity of gradient methods for the model-free linear quadratic regulator problem. *arXiv preprint arXiv:1912.11899*, 2019.
